# Supplementary material for: Phonon dispersion and electronic structure in quasi-one-dimensional layered Ta2NiSe7 single crystal
Source: Royal Society of Chemistry journal article supplement (doi:10.1039/d0tc03936e), 2020-11-18
Supplement: d0tc03936e1.pdf [file d0tc03936e1.pdf]

## Electronic Supplementary Information

### Phonon Dispersion and Electronic Structure In Quasi-one-Dimensional Layered Ta<sub>2</sub>NiSe<sub>7</sub> Single Crystal

Haiping Chen,<sup>a</sup> Zhongti Sun,<sup>b</sup>

<sup>a</sup>School of Mechanics and Optoelectronic Physics, Anhui University of Science and Technology, Huainan 232001, P. R. China.

<sup>b</sup>College of Energy, Soochow Institute for Energy and Materials Innovations (SIEMIS), Jiangsu Provincial Key Laboratory for Advanced Carbon Materials Wearable Energy Technologies, Soochow University, Suzhou 215006, P. R. China

To whom correspondence should be addressed, e-mail: ztsun@suda.edu.cn

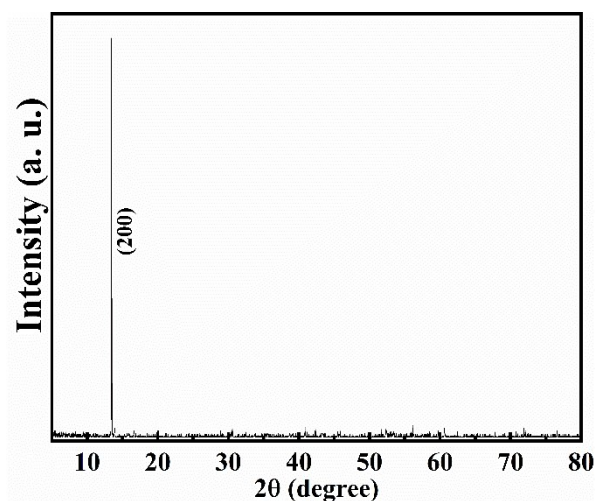

**Fig. 1** The X-ray diffraction pattern of single crystal Ta<sub>2</sub>NiSe<sub>7</sub>, which was obtained from the naturally exposed crystal face.

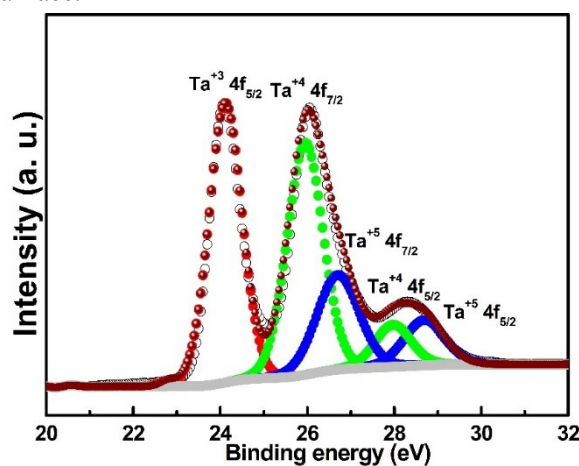

**Fig. 2** XPS for the valence states of 4f states of Ta element

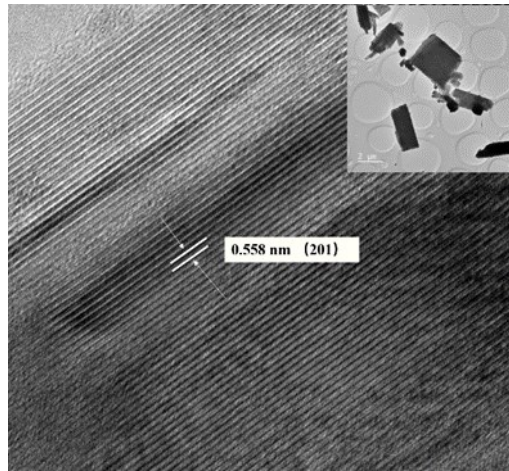

**Fig. 3** TEM image of single crystal  $\text{Ta}_2\text{NiSe}_7$ , the corresponding interplanar spacing and diffraction index were also given

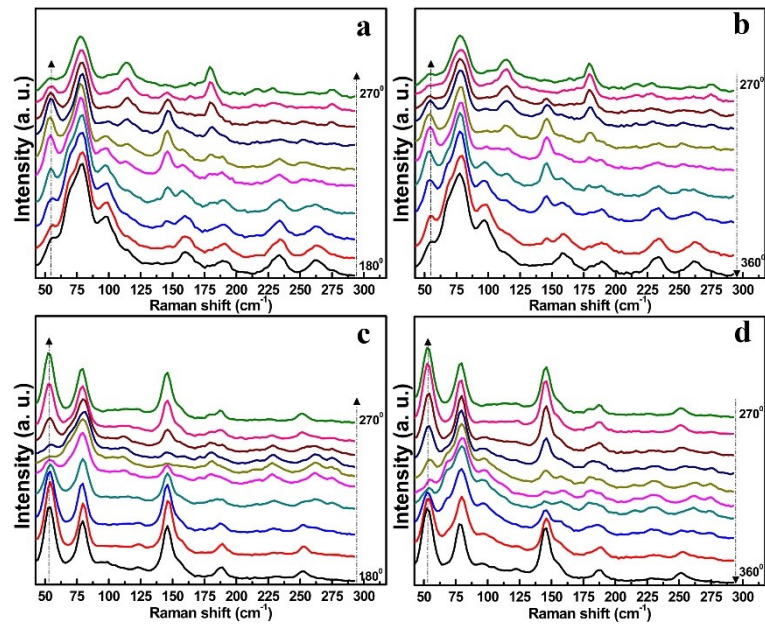

**Fig. 4** The intensity evolution of Raman peaks with angle from  $180^\circ$  to  $360^\circ$  for the (100) crystal plane, (a-b) parallel polarization, (c-d) vertical polarization.

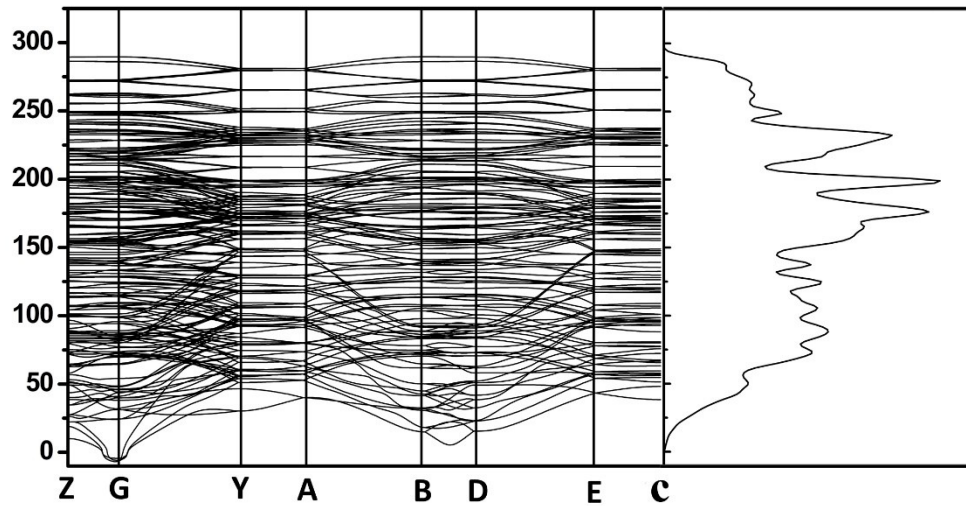

**Fig. 5** Phonon dispersion spectrum and corresponding density of state (DOS) for layered Ta<sub>2</sub>NiSe<sub>7</sub>.

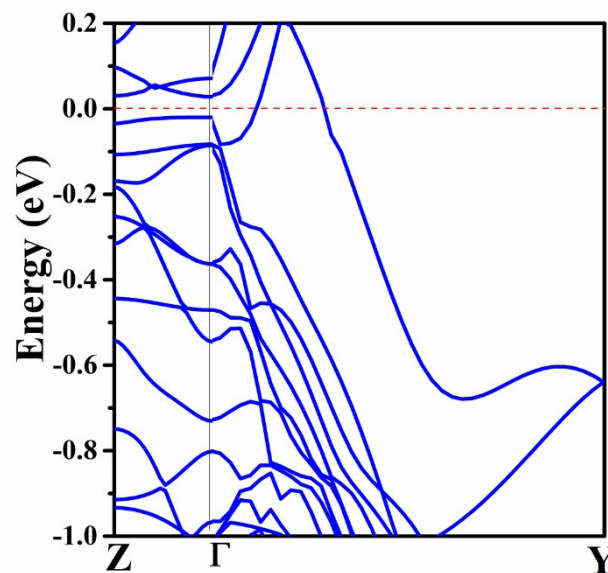

**Fig. 6** The band structure of layered Ta<sub>2</sub>NiSe<sub>7</sub> calculated by density functional theory using HSE06 functional

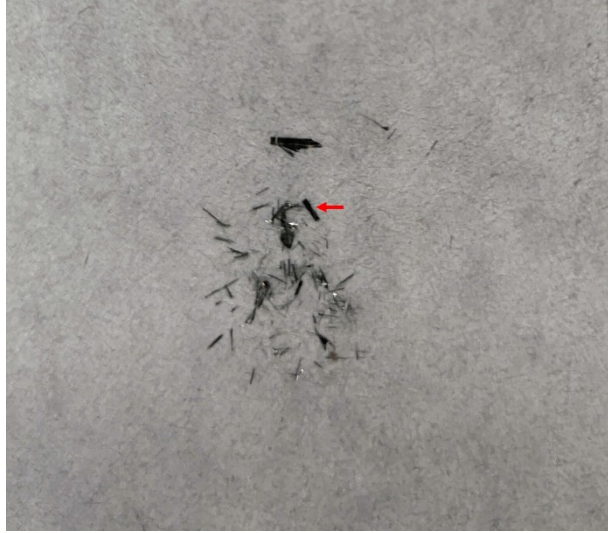

**Fig. 7** The synthesised Ta<sub>2</sub>NiSe<sub>7</sub> single crystal sample with about 2mm×8mm size.
